# Supplementary material for: Age-Dependent Changes in Geometry, Tissue Composition and Mechanical Properties of Fetal to Adult Cryopreserved Human Heart Valves
Source: PLoS One. 2016 Feb 11;11(2):e0149020. doi: 10.1371/journal.pone.0149020 (PMC4750936; doi:10.1371/journal.pone.0149020)
Supplement: S1 Appendix — (DOC) [file pone.0149020.s001.doc]

# Appendix S1. Extended description of the cell phenotype, tissue composition and maturation analysis.

Qualitative analyses

The sections were studied by hematoxylin and eosin (H&E) staining for general tissue composition, Masson Trichrome (MTC kit, Sigma HT15) for collagen, Verhoeff-Van Gieson staining for collagen and elastin, and Safranin-O staining for proteoglycans. Additionally, matrix components and cellular phenotype were assessed with immunofluorescent stainings. After pretreatment with 6 M guanidine-HCl, 50 mM dithiothreitol, 20 mM Tris (pH 8.0) and washing with 20 mM Tris (pH 8.0) for antigen retrieval, elastin was analyzed with a polyclonal rabbit IgG antibody against elastin (abcam, 1:500). Collagen type I and type III antigens were retrieved by boiling in 10 mM Sodium citrate-HCl buffer (pH 6.0) and incubation in 0.04% pepsin buffer, respectively. Thereafter, collagen type I and III were determined with a polyclonal rabbit IgG antibody against collagen type I (abcam, 1:250) and with polyclonal rabbit IgG antibody against collagen type III (abcam, 1:200). The phenotypic marker alpha smooth muscle actin (αSMA) antigen was retrieved by boiling in 10 mM sodium citrate-HCl buffer (pH 6.0) and analyzed with a monoclonal IgG2a mouse anti-human antibody against αSMA (Sigma, 1:500). αSMA was visualized with a goat anti-mouse IgG2a Alexa 488 (Molecular Probes, 1:300 dilution), while the matrix components were visualized with donkey anti-rabbit Alexa 555 (Molecular Probes, 1:300 dilution). Additionally, cell nuclei were stained with 4’,6-diamidino-2-phenylindole (DAPI).

Quantitative analyses

The amount of DNA (representing total cell number) in the leaflets was quantified using the Hoechst dye method [1] with a reference curve prepared of calf thymus DNA (Sigma). A modification of the assay described by Farndale *et al.* (1986) [2] with shark cartilage chondroitin sulfate as a reference was used to measure the content of sGAG. To determine the hydroxyproline quantity, as a measure for the collagen content, the assay according to Huszar *et al.* (1980) [3] and a reference of trans-4-hydroxyproline (Sigma) was used. The content of DNA, sGAG and hydroxyproline was expressed as g per mg dry weight. The number of mature collagen hydroxylysyl pyridinoline (HP) and lysyl pyridinoline (LP) cross-links, as a measure of tissue maturity, was measured in the digested samples using high-performance liquid chromatography as described previously [4-6]. The number of HP and LP cross-links was expressed per collagen triple helix, thus representing cross-link density.

## References

1. Cesarone CF, Bolognesi C, Santi L. Improved microfluorometric DNA determination in biological material using 33258 Hoechst. *Analytical biochemistry*. 1979;100(1):188–97.

2. Farndale RW, Buttle DJ, Barrett a J. Improved quantitation and discrimination of sulphated glycosaminoglycans by use of dimethylmethylene blue. *Biochimica et biophysica acta*. 1986;883(2):173–7.

3. Huszar G, Maiocco J, Naftolin F. Monitoring of collagen and collagen fragments in chromatography of protein mixtures. *Analytical biochemistry*. 1980;105(2):424–9.

4. Bank RA, Jansen EJ, Beekman B, te Koppele JM. Amino acid analysis by reverse-phase high-performance liquid chromatography: improved derivatization and detection conditions with 9-fluorenylmethyl chloroformate. *Analytical biochemistry*. 1996;240(2):167–76.

5. Robins SP, Duncan A, Wilson N, Evans BJ. Standardization of pyridinium crosslinks, pyridinoline and deoxypyridinoline, for use as biochemical markers of collagen degradation. *Clinical chemistry*. 1996;42(10):1621–6.

6. Bank RA, Beekman B, Verzijl N, de Roos JA, Sakkee AN, TeKoppele JM. Sensitive fluorimetric quantitation of pyridinium and pentosidine crosslinks in biological samples in a single high-performance liquid chromatographic run. *Journal of chromatography. B, Biomedical sciences and applications*. 1997;703(1-2):37–44.
